## CORRECTION

# Correction: Establishing an infrastructure for collaboration in primate cognition research

The *PLOS ONE* staff

## Notice of republication

An incorrect version of the author byline was published in error. This article was republished on October 28, 2019 to correct for this error. Please download this article again to view the correct version.

## Reference

1. Primates Many, Altschul DM Beran MJ, Bohn M, Call J, DeTroy S, et al. (2019) Establishing an infrastructure for collaboration in primate cognition research. *PLoS ONE* 14(10): e0223675. <https://doi.org/10.1371/journal.pone.0223675> PMID: 31648222

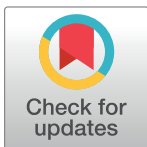

## OPEN ACCESS

**Citation:** The *PLOS ONE* staff (2019) Correction: Establishing an infrastructure for collaboration in primate cognition research. *PLoS ONE* 14(11): e0225236. <https://doi.org/10.1371/journal.pone.0225236>

**Published:** November 7, 2019

**Copyright:** © 2019 The PLOS ONE staff. This is an open access article distributed under the terms of the [Creative Commons Attribution License](https://creativecommons.org/licenses/by/4.0/), which permits unrestricted use, distribution, and reproduction in any medium, provided the original author and source are credited.
